# Supplementary material for: MnO2 nanowires anchored on amine functionalized graphite nanosheets: highly active and reusable catalyst for organic oxidation reactions
Source: Royal Society of Chemistry journal article supplement (doi:10.1039/c5ra17777d), 2015-01-01
Supplement: c5ra17777d1.pdf [file c5ra17777d1.pdf]

## MnO<sub>2</sub> Nanowires Anchored on Amine Functionalized Graphite Nanosheets: Highly Active and Reusable Catalyst for Organic Oxidation Reactions

A. Chakravarty,<sup>a</sup> D. Sengupta,<sup>b</sup> B. Basu,<sup>b\*</sup> A. Mukherjee<sup>a</sup> and G. De<sup>a\*</sup>

<sup>a</sup> Nano-Structured Materials Division, CSIR-Central Glass & Ceramic Research Institute,  
196, Raja S. C. Mullick Road, Kolkata-700032, India E-mail: gde@cgcri.res.in

<sup>b</sup> Department of Chemistry, North Bengal University, Darjeeling-734013, India E-mail:  
basu\_nbu@hotmail.com

### Electronic Supplementary Information (ESI)

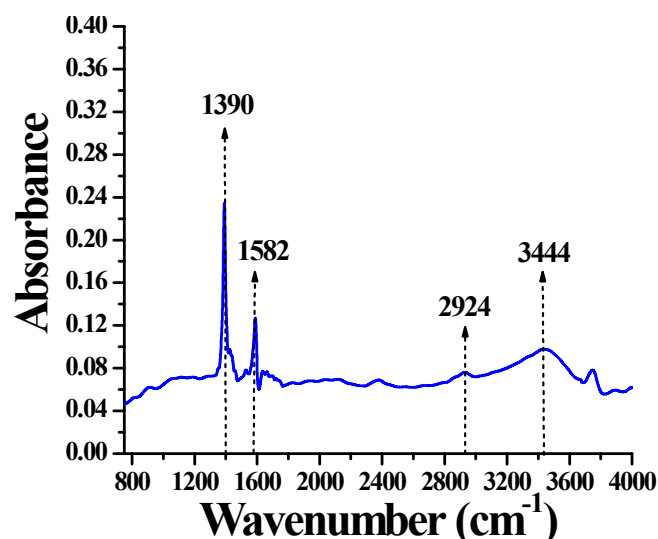

**Fig. S1** FTIR spectrum of -NO<sub>2</sub> functionalized GNS showing the marking of the peaks in the body of the figure.

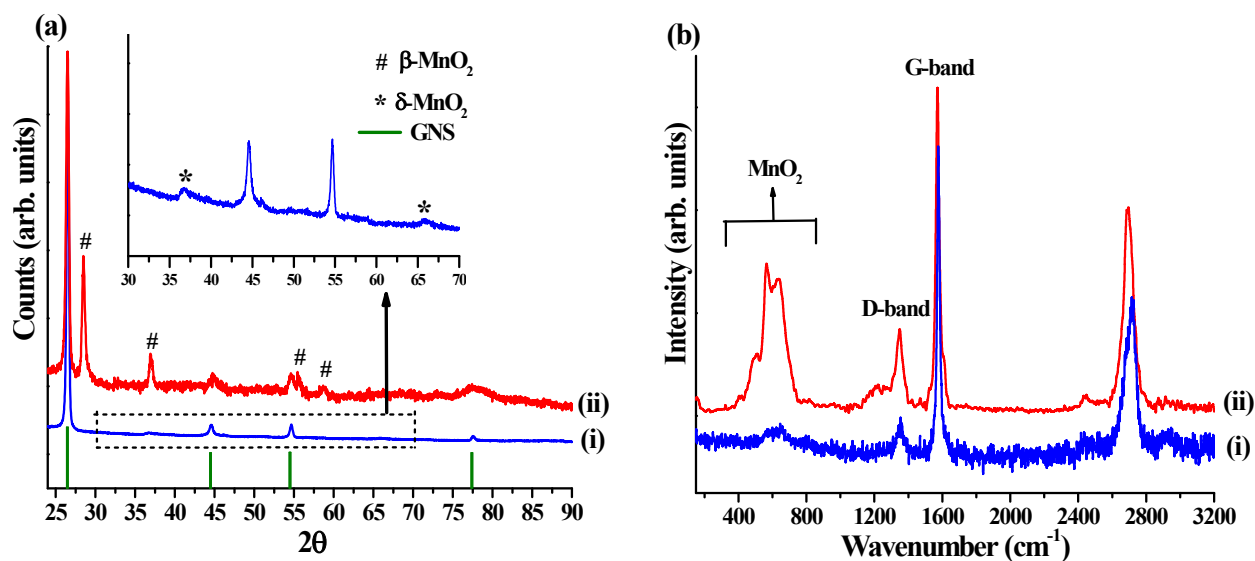

**Fig. S2** (a) XRD pattern and (b) Raman spectrum of (i) the control reaction carried out with microcrystalline graphite and (ii)  $\text{MnO}_2$ @AFGNS. For better comparison the plot for  $\text{MnO}_2$ @AFGNS has been added in both the cases. Negligible peak of  $\text{MnO}_2$  is visible in both the XRD pattern and Raman spectrum for the control reaction carried out with microcrystalline graphite.

**Table S1** Oxidation of 4-methoxybenzyl alcohol using  $\text{MnO}_2$ @AFGNS catalyst with different loading of  $\text{MnO}_2$ .<sup>a</sup>

| Entry | Catalyst                        | Temp. °C | Time (h) | Yield (%) <sup>b</sup> |
|-------|---------------------------------|----------|----------|------------------------|
| 1     | $\text{MnO}_2$ @AFGNS (3.1 wt%) | 100      | 12       | 72                     |
| 2     | $\text{MnO}_2$ @AFGNS (6 wt%)   | 100      | 12       | 83                     |
| 3     | $\text{MnO}_2$ @AFGNS (7.6 wt%) | 100      | 12       | 82                     |

[a] 4-Methoxybenzyl alcohol (0.5 mmol), catalyst (0.035 mmol  $\text{MnO}_2$ ), 1,4-dioxane (3 mL), reaction carried out under aerobic condition. [b] Isolated yield.

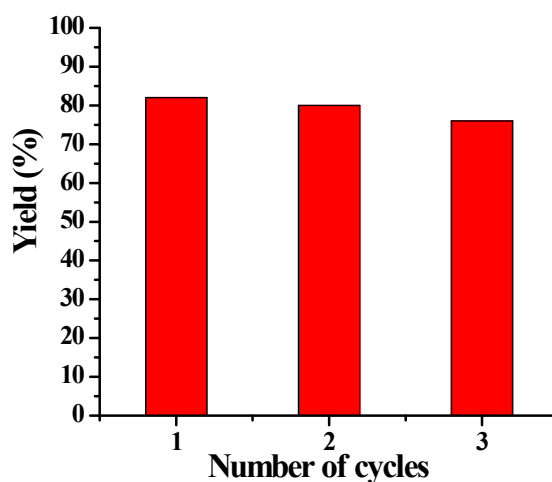

**Fig. S3** Recyclability of  $\text{MnO}_2$ @AFGNS in 3 subsequent cycles on carrying out the reaction with 4-methoxybenzyl alcohol (0.5 mmol),  $\text{MnO}_2$ @AFGNS (40 mg; 0.035 mmol equivalent  $\text{MnO}_2$ ) and 1,4-dioxane (3 mL) at 100 °C in open air.

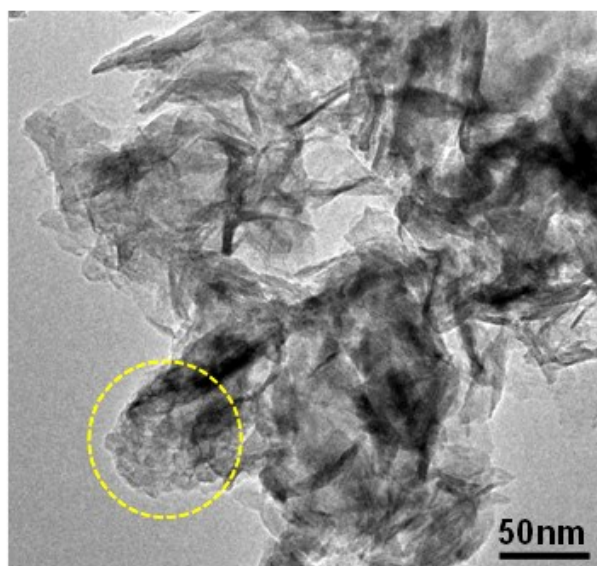

**Fig. S4** TEM image of the  $\text{MnO}_2$ @AFGNS catalyst recovered after third catalytic cycle. The  $\text{MnO}_2$  nanowires are visible in the image along with some agglomerated NP (encircled in body of image). This indicates that some deterioration in the structure of  $\text{MnO}_2$  nanowires occurred during the course of reaction.
